1 **ACE2 is necessary for SARS-CoV-2 infection and sensing by macrophages but not**  
2 **sufficient for productive viral replication**

3  
4 Larisa I Labzin<sup>1,2,3\*</sup>, Keng Yih Chew<sup>4</sup>, Xiaohui Wang<sup>1,2</sup>, Tyron Esposito<sup>1,2</sup>, Claudia J  
5 Stocks<sup>1,2</sup>, James Rae<sup>1,9</sup>, Teodor Yordanov<sup>1</sup>, Caroline L Holley<sup>1,2</sup>, Stefan Emming<sup>1,2</sup>, Svenja  
6 Fritzl<sup>5</sup>, Francesca L. Mordant<sup>5</sup>, Daniel P. Steinfurt<sup>6,7</sup>, Kanta Subbarao<sup>5,8</sup>, Anne K  
7 Legendijk<sup>1</sup>, Robert Parton<sup>1,9</sup>, Kirsty R. Short<sup>3,4</sup>, Sarah L. Londrigan<sup>5, #</sup>, Kate Schroder<sup>1,2,3,4, #</sup>.

8  
9 #These authors contributed equally

10 \* Correspondence should be addressed to [l.labzin@uq.edu.au](mailto:l.labzin@uq.edu.au)

11  
12 <sup>1</sup>Institute for Molecular Bioscience (IMB), The University of Queensland, Brisbane, QLD,  
13 Australia

14 <sup>2</sup>IMB Centre for Inflammation and Disease Research, The University of Queensland,  
15 Brisbane, QLD, Australia

16 <sup>3</sup>Australian Infectious Diseases Research Centre, The University of Queensland, Brisbane,  
17 QLD, Australia

18 <sup>4</sup>School of Chemistry and Molecular Biosciences, The University of Queensland, Brisbane,  
19 QLD, Australia

20 <sup>5</sup>Dept of Microbiology and Immunology, The University of Melbourne at the Peter Doherty  
21 Institute for Infection and Immunity, Melbourne, Victoria, Australia.

22 <sup>6</sup>Department of Medicine, The University of Melbourne, Parkville, Victoria, Australia

23 <sup>7</sup>Department of Respiratory Medicine, Royal Melbourne Hospital, Parkville, Victoria,  
24 Australia

25 <sup>8</sup>WHO Collaborating Centre for Reference and Research on Influenza, Victorian Infectious  
26 Diseases Reference Laboratory, at The Peter Doherty Institute for Infection and Immunity,  
27 Melbourne, Victoria, Australia.

28 <sup>9</sup>Centre for Microscopy and Microanalysis, The University of Queensland, Brisbane, QLD,  
29 Australia

30  
31  
32  
33

34 **Abstract**

35

36 Macrophages are a major source of pro-inflammatory cytokines in COVID-19. How  
37 macrophages sense the causative virus, SARS-CoV-2, to drive cytokine release is, however,  
38 unclear. Here, we show that human macrophages do not directly sense and respond to  
39 infectious SARS-CoV-2 virions because they lack sufficient ACE2 expression to support  
40 virus entry and replication. Over-expression of ACE2 in human macrophages permits SARS-  
41 CoV-2 entry and early-stage replication and facilitates macrophage pro-inflammatory and  
42 anti-viral responses. ACE2 over-expression does not, however, permit the release of newly  
43 synthesised virions from SARS-CoV-2-infected macrophages, consistent with abortive  
44 replication. Release of new, infectious SARS-CoV-2 virions from ACE2 over-expressing  
45 macrophages only occurred if anti-viral mediator induction was also blocked, indicating that  
46 macrophages restrict SARS-CoV-2 infection at two stages of the viral life cycle. These  
47 findings resolve the current controversy over macrophage-SARS-CoV-2 interactions and  
48 identify a signalling circuit that directly links macrophage recognition of SARS-CoV-2 to  
49 restriction of viral replication.

50

51

52 **One sentence summary:**

53

54 ACE2 is necessary for SARS-CoV-2 infection and sensing by macrophages but not sufficient  
55 for productive viral replication.

56

57 **Main Text**

58

59 **INTRODUCTION**

60

61 Effective host defence against infection relies on accurate and timely immune detection.

62 Accumulating evidence suggests that severe COVID-19, caused by Severe Acute Respiratory

63 Syndrome Coronavirus 2 (SARS-CoV-2) infection, results from a failure of early host

64 interferon signalling to control the virus, followed by exacerbated pro-inflammatory

65 responses driving tissue damage. Airway epithelial cells, the primary target for SARS-CoV-2

66 infection (1), respond by releasing both anti-viral and pro-inflammatory cytokines (2, 3).

67 Airway-resident or newly recruited macrophages also appear to be a key source of pro-

68 inflammatory cytokines in severe COVID-19 (4, 5), with macrophage-derived cytokines

69 implicated in the severe pathology seen in patients (6–9)

70

71 SARS-CoV-2, belonging to the *Coronaviridae* family, is an enveloped, single-stranded RNA

72 virus with a positive-sense genome. Many human respiratory viruses, including SARS-CoV-

73 2, infect epithelial cells lining the upper and lower airways, resulting in productive replication

74 and the release of newly synthesised infectious viral particles. The virus Spike (S)

75 glycoprotein facilitates entry into target epithelial cells by binding to surface expressed

76 angiotensin-converting enzyme 2 (ACE2) receptor (10). The well characterised ACE2-Spike

77 interaction exposes a critical S cleavage site (S2) that can then be cleaved by the host serine

78 protease transmembrane protease, serine 2 (TMPRSS2), also expressed on the plasma

79 membrane. This allows fusion of the viral and cellular membranes, followed by release of

80 viral RNA directly into the cytoplasm (reviewed by ((11) and (12)). SARS-CoV-2,

81 particularly the omicron variant, can also attach to ACE2 and enter cells via the endocytic

82 pathway, where S protein is cleaved by endosomal proteases to allow fusion between the

83 viral and endosomal membranes (13). The infecting RNA genome is then translated into two

84 large polyproteins that can be proteolytically processed to generate individual viral proteins

85 for replication and transcription. New virions are assembled in the endoplasmic reticulum and

86 Golgi of the host cell, and are secreted from the cell via exocytosis or through a lysosomal

87 egress pathway (12). The SARS-CoV-2 replication cycle has primarily been characterised in

88 epithelial cells and cell lines. How this may differ in other potentially susceptible cell types,

89 including immune cells, remains unclear.

90

91 Macrophages are sentinel innate immune cells that are present in the airway during  
92 respiratory viral infection and are critical for effective host defence. In contrast to epithelial  
93 cells, however, human macrophage infection with many respiratory viruses (including  
94 seasonal influenza A viruses (14), and rhinovirus (15)) is abortive, despite macrophages  
95 being susceptible to the early stages of infection (entry and synthesis of new viral RNA and  
96 protein). In addition to acting as a viral ‘dead end’ to limit viral dissemination (16),  
97 macrophages can sense infectious virions, neighbouring cell infection and damage to drive  
98 anti-viral and pro-inflammatory cytokines, which control viral loads in many respiratory  
99 infections (17–19). The contribution of macrophages to potent and effective innate responses  
100 to control SARS-CoV-2 infection is controversial. While there is consensus that SARS-CoV-  
101 2 infection of human monocyte derived macrophages (HMDM) is abortive (3, 8, 9, 20–22),  
102 some studies report that macrophages are susceptible to the early-stages of SARS-CoV-2  
103 infection (i.e. viral entry) and replication, (i.e. viral RNA replication and protein synthesis)  
104 (8, 9, 20), while others report no viral entry into macrophages (3, 22). Accordingly, whether  
105 macrophage susceptibility to SARS-CoV-2 is required to trigger inflammatory and anti-viral  
106 signalling is unclear, with multiple reports suggesting that macrophage infection triggers pro-  
107 inflammatory responses (8, 9, 23) while others report that infection does not activate  
108 macrophage inflammatory functions (3, 22). In this study, we investigated whether  
109 macrophages sense infectious SARS-CoV-2 virions to trigger pro-inflammatory and anti-  
110 viral mediator release. In so doing, we resolve the controversy of whether primary human  
111 monocyte-derived and airway-resident macrophages are susceptible and permissive to SARS-  
112 CoV-2 infection.

113

## 114 **RESULTS**

115

### 116 **Human monocyte-derived macrophages (HMDM) do not release pro-inflammatory** 117 **cytokines or anti-viral mediators upon SARS-CoV-2 exposure**

118

119 During infection with SARS-CoV-2, monocytes are rapidly recruited from the circulation to  
120 the infected lungs (4), where they differentiate into macrophages that encounter the virus. To  
121 model this, we incubated HMDM with SARS-CoV-2 and monitored macrophage responses  
122 by quantifying cytokine release in cellular supernatants. We challenged HMDM with a high  
123 dose of SARS-CoV-2 (multiplicity of infection; MOI 5) for 24h without removing the virus  
124 to allow maximal macrophage responses. SARS-CoV-2 did not trigger CXCL10, IL-6 or

125 TNF release *in vitro* (**Figure 1A**), despite reports indicating that these cytokines circulate at  
126 high levels *in vivo* during SARS-CoV-2 infection (24, 25). By contrast, HMDM showed a  
127 robust secretory response to synthetic viral mimetics such as the toll-like receptor (TLR) 7/8  
128 ligand, R848 (TNF, IL-6) and the melanoma differentiation-associated protein 5 (MDA5)  
129 ligand, transfected poly I:C (pIC) (CXCL10) (**Figure 1A**). mRNA analyses revealed that  
130 SARS-CoV-2 did not upregulate HMDM expression of *Ifnb1*, *Ifnl1*, *Cxcl10*, *Il6*, *Tnf* or *Il1b*  
131 at 2h or 24h post-infection (p.i.), at either low (0.5) or high (5) MOI, while these genes were  
132 robustly induced by R848 and pIC (**Figure 1B**). Thus, HMDM do not respond to SARS-  
133 CoV-2 exposure *in vitro*, even at the high MOI of 5.

134

### 135 **HMDM and primary human airway macrophages do not support infection and** 136 **replication of SARS-CoV-2**

137

138 The failure of primary HMDM to respond to SARS-CoV-2 exposure contrasts with previous  
139 reports that demonstrated SARS-CoV-2 induces the expression of cytokine mRNAs  
140 (including *Il6*, *Cxcl10*, and *Tnf*) in HMDM (8, 9, 23, 26). We therefore investigated whether  
141 the HMDMs generated in this study were susceptible to SARS-CoV-2 infection and  
142 replication. SARS-CoV-2-permissive Calu3 epithelial cells were included as a positive  
143 control for viral infection and replication. The viral inoculum was left on the cells as before  
144 to maximise uptake of SARS-CoV-2 virions by HMDM. Calu3 cells were susceptible to  
145 infection with both high and low dose infection (MOI 5 and 0.5) as we observed an increase  
146 in cell-associated viral RNA between 2h (indicative of input virus) and 24h post-infection,  
147 indicating newly synthesized viral RNA and active replication (**Figure 2A**). In contrast, cell-  
148 associated viral RNA levels did not increase in HMDM infected with either MOI over the  
149 same time (**Figure 2B**). Further, newly synthesised viral protein was evident in Calu3 control  
150 cells, where viral nucleoprotein (NP) expression increased from 2h to 72h in Calu3 (**Figure**  
151 **2C**). In contrast, HMDM did not support the production of newly synthesised viral NP,  
152 where NP expression was barely detectable at 24h post-infection, compared to detectable NP  
153 associated with input virus at 2h post-infection (**Figure 2D**). These data indicate that HMDM  
154 are not susceptible to SARS-CoV-2 infection and do not support the early stages of viral  
155 replication, including the production of newly synthesized viral RNA and protein.

156

157 The lung-resident macrophage population are immune sentinels of the airways, with different  
158 origins and properties from those of HMDM (27). Along with airway epithelial cells, airway

159 macrophages are primary targets for infection by various respiratory viruses. We next  
160 investigated whether this lung-resident macrophage population differed from HMDM in their  
161 susceptibility to SARS-CoV-2 infection and replication. Airway macrophages, obtained from  
162 bronchoalveolar lavage (BAL) and considered to be representative of resident lung  
163 macrophages, were isolated from three donors and infected with SARS-CoV-2 at an MOI of  
164 1. SARS-CoV-2-infected BAL macrophages showed no increase in cell-associated viral RNA  
165 (indicative of the early stages of virus replication) between 2h and 48h post-infection, in  
166 contrast to the SARS-CoV-2-susceptible control cell line VERO E6 (**Figure 2E**). An increase  
167 in viral RNA isolated from cell-free VERO E6 supernatants between 2 and 24h post-infection  
168 was indicative of productive viral replication, with release of newly synthesized viral RNA  
169 from infected cells, but this was not observed in supernatants of SARS-CoV-2 infected BAL  
170 macrophages (**Figure 2F**). These data indicate that as for HMDM, airway macrophages are  
171 not permissive to at least the early stages of SARS-CoV-2 infection and replication.

172

### 173 **Macrophage susceptibility to SARS-CoV-2 requires ACE2 expression**

174

175 Macrophages may restrict SARS-CoV-2 replication at different stages in the viral life cycle,  
176 including during entry. As ACE2 is the primary receptor facilitating SARS-CoV-2  
177 attachment to host cells, we next investigated whether ACE2 expression could be a  
178 determining factor in macrophage resistance to SARS-CoV-2 infection. We assessed ACE2  
179 mRNA and protein levels by qPCR and immunoblot, and observed low *Ace2* mRNA  
180 expression, and no ACE2 protein expression in HMDM isolated from 4 individual donors  
181 (**Figure 3A, B**), even when HMDM were treated with IFN $\beta$  (**Figure 3B**). Similarly, ACE2  
182 protein was not detected in airway macrophages isolated from BAL macrophages of 3  
183 individual donors (**Figure 3C**). We used lentiviral transduction to overexpress either ACE2  
184 (untagged) or a control protein (mScarlet, mSc) in the THP-1 monocyte cell line and  
185 differentiated these to macrophage-like cells with phorbol-myristate-acetate (PMA). We  
186 confirmed that ACE2 overexpression in THP-1 cells resulted in readily detectable ACE2  
187 mRNA and protein (**Figure 3A, 3B**). The surface protease TMPRSS2, which is required for S  
188 protein cleavage, was also readily detected at the protein level in HMDM and THP-1-ACE2  
189 cells (**Figure 3B**).

190

191 We next explored whether insufficient ACE2 expression is the primary block to SARS-CoV-  
192 2 replication in macrophages. We thus challenged THP-1-ACE2 with SARS-CoV-2 (MOI  
193 0.5 and 5) and compared viral replication and release to THP-1-mSc and Calu3 control cells.  
194 There was a significant increase in cell-associated viral RNA in THP-1-ACE2 cells at 24h  
195 p.i. at both MOIs, before plateauing from 24 to 72h p.i., indicating cell susceptibility and  
196 early-stage viral RNA replication (**Figure 3D, 3E**). By contrast, viral RNA levels did not  
197 increase in the THP-1-mSc control cells at any timepoint (**Figure 3D, 3E**), similar to  
198 observations in HMDM and BAL macrophages (**Figure 2B, 2E, 2F**). As expected, in Calu3  
199 cells which support viral replication and virion release (28), SARS-CoV-2 RNA levels  
200 continued to increase over the time course (**Figure 3D, 3E**).

201  
202 To determine whether the increased cell-associated viral RNA in THP-1-ACE2 cells was  
203 coupled to the release of infectious virions, we performed plaque assays on cell-free  
204 supernatants to measure release of infectious viral particles, represented by plaque forming  
205 units (PFU). Despite increased cell-associated viral RNA, we observed a decrease in  
206 infectious viral particles in THP-1-ACE2 cells at 48 or 72h p.i. compared with input virus  
207 levels at 0h (**Figures 3F, 3G**). Similarly, we observed a decrease in infectious viral particles  
208 in THP-1-mSC cell-free supernatants (**Figure 3F, 3G**). In contrast, Calu3 cells were  
209 productively infected at the low MOI (MOI 0.5) over the same time course, indicated by a  
210 significant increase in infectious viral particles present in cell-free supernatants between 0  
211 and 72h p.i. (**Figure 3F**), though at high MOI (MOI 5) detection of new infectious virions  
212 peaked at 24h (**Figure 3G**). This suggests that while some new virions are produced in THP-  
213 1-ACE2 cells, a secondary block may serve to limit virus production in these cells. Together,  
214 these data suggest that ACE2 expression is necessary for SARS-CoV-2 entry and new viral  
215 RNA synthesis in macrophages but is not sufficient to support productive viral replication.  
216 Thus, macrophages have two blocks to productive SARS-CoV-2 replication – lack of ACE2  
217 expression, plus an additional mechanism downstream of viral entry and replication that  
218 limits release of infectious virions.

219

## 220 **Macrophages can take up SARS-CoV-2 independently of ACE2**

221

222 Additional SARS-CoV-2 entry receptors beyond ACE2 are reported, such as the C-type  
223 lectin receptors (CLRs) (23). As our assays to measure viral protein and RNA were unable to  
224 distinguish whether virus is intracellular or extracellular (Figure 2B,2D), we next determined

225 whether SARS-CoV-2 can still bind and enter HMDM, despite lack of ACE2 expression. We  
226 used transmission electron microscopy to determine the sub-cellular location of incoming  
227 virions. To capture these events, we used a high MOI of 20. HMDM (**Figure 4A, A'**) and  
228 THP-1-ACE2 (**Figure 4B**) showed internalised, intact virions within the phagosomal system  
229 after 1h infection. In THP-1-ACE2 cells but not HMDM, we also observed virions bound and  
230 potentially starting to fuse at the plasma membrane (**Figure 4C, C'**), and these were  
231 morphologically similar to the new structures being released from Calu3 at 72h p.i. (**Figure**  
232 **4D**). As THP-1-ACE2 cells endogenously express TMPRSS2 (**Figure 3B**), this suggests that  
233 THP-1-ACE2 cells may support viral fusion at the plasma membrane to deliver the viral  
234 genome and NP directly into the cytoplasm. Taken together, these results suggest that while  
235 HMDM can take up SARS-CoV-2 into phagosomal compartments, low ACE2 expression  
236 will preclude SARS-CoV-2 S processing and virus-cell membrane fusion, steps that are  
237 necessary for this virus to enter the cytoplasm.

238

### 239 **Ectopic ACE2 expression potentiates macrophage inflammatory responses to SARS-** 240 **CoV-2**

241

242 During infection, cells can sense incoming virions in addition to newly synthesised viral  
243 RNA and proteins (29–31). Although we detected viral particles in HMDM phagosomal  
244 compartments at 1h p.i. (**Figure 4A'**), this did not correlate with HMDM activation upon  
245 SARS-CoV-2 challenge (**Figure 1A, 1B**), suggesting that virions in these compartments were  
246 not detected by the cell. Given that ACE2 overexpression in macrophages permits efficient  
247 SARS-CoV-2 entry and early-stage viral replication, we next assessed whether THP-1-ACE2  
248 cells produce pro-inflammatory and anti-viral mediators upon SARS-CoV-2 challenge. THP-  
249 1-ACE2 cells strongly upregulated *Ifnb1*, *Ifnl1*, *Cxcl10* and *IL-6* mRNA expression after  
250 infection with SARS-CoV-2 for 24h (at MOI 5, **Figure 5A**; or MOI 0.5, **Supp. Figure 5A**),  
251 correlating with increased SARS-CoV-2 viral RNA levels (**Figure 3E**). THP-1-mSc cells did  
252 not respond to SARS-CoV-2 challenge at either MOI (**Figure 5A, Supp Figure 5A**), similar  
253 to HMDM (**Figure 1A, 1B**). We confirmed that viral sensing pathways were operational in  
254 both THP-1-ACE2 and THP-1-mSc, by stimulating MDA5 via pIC transfection (**Supp**  
255 **Figure 5B**). In Calu3 cells, both anti-viral (*Ifnb1*, *Ifnl1*, *Cxcl10*) and pro-inflammatory (*Tnf*,  
256 *IL6*) gene induction peaked at 72h p.i. (at MOI 5, **Figure 5B**; MOI 0.5, **Supp Figure 5C**),  
257 consistent with published observations (3), and the rise in SARS-CoV-2 viral RNA  
258 expression (**Figure 3E,F**) and productive virus release (**Figure 3G,H**). Collectively, these



259 data suggest that ACE2 overexpression, which permits early-stage viral replication, is  
260 necessary for macrophage to sense infectious SARS-CoV-2 virions.

261

### 262 **Blocking cytokine signalling in THP-1-ACE2 cells rescues productive virion release**

263

264 Collectively, our findings suggest that human macrophages are not susceptible to infection  
265 with SARS-CoV-2 due to insufficient ACE2 receptor expression. Furthermore, while ACE2  
266 overexpression can restore the permissivity of macrophages to the early stages of SARS-  
267 CoV-2 infection and replication, this does not result in productive viral infection, as  
268 infectious virions detected in the supernatant did not increase above the level of input virus  
269 (0h). It is possible that macrophage ACE2 expression is upregulated by stimuli present at  
270 sites of *in vivo* infection; if so, mechanisms by which ACE2-expressing macrophages restrict  
271 virus production may contribute to viral control *in vivo*. We thus explored potential  
272 mechanisms by which THP-1-ACE2 cells limit viral replication and release of new virions.  
273 Host cell death is proposed to limit release of SARS-CoV-2 infectious virions (32), and  
274 indeed, virus-challenged THP-1-ACE2 cells showed a modest but significant decrease  
275 (~20%) in viability compared to THP-1-mSc cells at 72 h p.i. at high MOI (MOI5, **Figure**  
276 **6A**). Thus, cell death may limit virus release from THP-1-ACE2 when these cells encounter  
277 high viral loads.

278

279 We noted that the rapid and robust induction of Type I and III interferons, peaking at 24h p.i.  
280 in the THP-1-ACE2 cells, was delayed in the Calu3 cells (**Figure 5A, 5B**). Interferons can  
281 signal in both an autocrine and paracrine manner to activate an anti-viral state through the  
282 induction of interferon-stimulated genes, which act as restriction factors to limit viral  
283 infection (33). Indeed, Type I IFN is critical for abortive influenza A virus infection in  
284 murine macrophages (16). We hypothesised that interferon signalling in THP-1-ACE2 cells  
285 induces host factors that impede viral replication, precluding the release of productive  
286 virions. In contrast, the later induction of *Ifnb1* and *Ifnl1* in Calu3 cells, potentially through  
287 viral antagonism, likely allows for continuing viral replication and release. We tested this  
288 hypothesis using a TBK1 inhibitor (BX-795) to block virus-induced interferon induction and  
289 signalling (34) (**Figure 6B**). As expected, BX- suppressed pIC-induced expression of *Ifnb1*  
290 and *Ifnl1* and the interferon-stimulated gene *Cxcl10* (**Supp Figure 6A**). We next challenged  
291 THP-1-ACE2 and Calu3 cells with SARS-CoV-2 for 72 h, in the presence and absence of  
292 BX-795. BX-795 suppressed SARS-CoV-2-induced CXCL10 production from THP-1-ACE2

293 cells (**Figure 6C**) and restored productive virion release (**Figure 6D**). BX-795 did not affect  
294 productive virion release from Calu3 cells (**Figure 6E**), consistent with published  
295 observations (3). These findings indicate that, should macrophages upregulate ACE2 at sites  
296 of *in vivo* infection to permit SARS-CoV-2 entry, their capacity to rapidly induce interferon  
297 signalling suppresses viral replication to prevent viral dissemination. In sum, human  
298 macrophages protect themselves from productive SARS-CoV-2 infection through dual  
299 mechanisms: (1) low ACE2 expression, which prevents viral entry; and (2) rapid interferon-  
300 mediated anti-viral defence upon cell compromise.

301

## 302 **DISCUSSION**

303

304 A key question in SARS-CoV-2 pathogenesis is which host cells sense SARS-CoV-2 to  
305 trigger inflammatory cytokines and anti-viral mediator release. Given that macrophages are  
306 primary candidates for sensing and responding to SARS-CoV-2 (7), a second, unresolved  
307 question is whether SARS-CoV-2 can infect and productively replicate in human  
308 macrophages. This study elucidates the requirements for macrophages to sense and respond  
309 to SARS-CoV-2.

310

311 We demonstrate that primary HMDM do not respond to SARS-CoV-2 challenge, despite  
312 taking up virus through phagocytosis. We found that both BAL macrophages and HMDM do  
313 not express ACE2 protein, rendering them resistant to early-stage SARS-CoV-2 replication.  
314 In turn, ectopic expression of ACE2 rendered macrophages susceptible to SARS-CoV-2 entry  
315 and replication and able to mount ensuing robust pro-inflammatory and anti-viral responses.  
316 Intriguingly, ectopic ACE2 expression was not sufficient for macrophages to efficiently  
317 release new virions, and thereby increase viral titres. In this context, productive virion release  
318 can be rescued by disabling macrophage interferon production and signalling. Thus,  
319 macrophages have two key mechanisms that block productive SARS-CoV-2 infection: (1)  
320 lack of ACE2 prevents productive viral entry, and (2) in the presence of ACE2, viral sensing  
321 triggers rapid induction of potent anti-viral mediators to suppress the release of new virions.

322

323 Typically, a virus must directly infect and replicate in a cell to trigger the cytosolic pattern  
324 recognition receptors (PRRs), triggering so-called 'cell intrinsic' sensing, concomitant with a  
325 high level of threat to that cell. These cytosolic PRRs are ubiquitously expressed, and their  
326 activation leads to potent anti-viral mediator production (e.g. interferons-alpha, -beta, -

327 lambda), inflammatory cytokine signalling or cell death (35), all of which function to limit  
328 viral replication and warn neighbouring cells of imminent danger. In addition to these  
329 cytosolic PRRs, macrophages are also equipped with PRRs at distinct subcellular locations  
330 (e.g. cell surface, endosomes) to detect moderate threats, including signs of infection in  
331 neighbouring cells, viral pathogen-associated molecular patterns (PAMPs) or host danger-  
332 associated molecular patterns (DAMPs) in the extracellular milieu (36). This ‘cell extrinsic’  
333 sensing reflects the local microenvironment, and through triggering cell-surface or endosomal  
334 PRRs, can induce a distinct suite of anti-viral and pro-inflammatory responses to ‘cell  
335 intrinsic’ sensing (35).

336

337 Our data indicate that primary HMDM do not directly respond to SARS-CoV-2 exposure  
338 with cytokine production (**Figure 1A, 1B**), as might be anticipated in settings of macrophage  
339 sensing of ‘cell intrinsic’ infection. Our results agree with published observations that SARS-  
340 CoV-2 does not trigger cytokine production from HMDM (22), and that SARS-CoV-2 also  
341 fails to trigger the interferon system in human alveolar macrophages (21). Findings from us  
342 and others (21, 22) are, however, at odds with other reports that SARS-CoV-2 selectively  
343 induces a pro-inflammatory response (e.g., TNF, IL-6, CXCL10) from HMDM (8, 9, 20). It  
344 is possible that differences in the preparation or quantification of viral stocks may underpin  
345 these divergent observations. SARS-CoV-2 is usually cultured in cell lines (e.g., VERO E6  
346 cells; Calu3 cells: (8)) that inherently respond to infection by producing cytokines or  
347 undergoing cell death. Indeed, virus is often harvested at a time point when a visible  
348 cytopathic effect emerges, meaning that individual viral preparations quantified for intact  
349 virions by TCID<sub>50</sub> or plaque assays may additionally contain free viral RNA, viral proteins,  
350 non-infectious virions, and parental cell line-derived DAMPs and cytokines (37). It is thus  
351 conceivable that published macrophage responses to viral preparations may represent an  
352 indirect response to epithelial infection or viral PAMPs. As such, selective macrophage pro-  
353 inflammatory responses that have been mapped to myeloid-expressed CLRs detecting  
354 glycosylated SARS-CoV-2 S (23), or cell surface TLR2 detecting viral envelope (E) protein  
355 (26) may reflect sensing of free viral proteins, rather than intact, infectious virions.  
356 Nevertheless, our viral stocks did not trigger cytokine release from human primary  
357 macrophages or THP-1 cells, unless ACE2 was ectopically expressed to allow SARS-CoV-2  
358 entry and early-stage replication (**Figure 1A, 1B, Figure 5A**). This suggests that human  
359 macrophages do not sense infectious SARS-CoV-2 virions unless they are instructed to  
360 upregulate ACE2 expression. We anticipate that this observation will hold true for ACE2-

361 dependent SARS-CoV-2 variants, including Omicron (B.1.1.529 and BA lineages), and  
362 indeed any beta-coronaviruses that utilize ACE2. Consistent with this, SARS-CoV, which  
363 also requires ACE2 for entry, does not trigger macrophage cytokine responses (38).

364

365 We also observe that SARS-CoV-2 does not replicate in human macrophages and does not  
366 trigger productive virion release. This is in line with multiple reports of abortive SARS-CoV-  
367 2 infection of macrophages *in vitro* (8, 9, 20, 21). While these studies observe that  
368 macrophage infection results in decreasing viral RNA levels (8, 9, 20), lack of new infectious  
369 virus (8, 20), and decreasing viral protein (21), they nevertheless report virus entry into  
370 macrophages via quantification of SARS-CoV-2 nucleoprotein-positive cells. This is in  
371 contrast to studies reporting no infection of macrophages (3, 22). We find that SARS-CoV-2  
372 virions can enter macrophages, based on virion detection in phagosomes (**Figure 4A'**).

373 Despite this entry into intracellular compartments, we propose that virus does not enter the  
374 macrophage cytoplasm, likely because ACE2 is required for conformational changes to the  
375 virus Spike protein that are necessary for viral membrane fusion. This may explain why viral  
376 RNA is detected within both airway-resident and recruited during single-cell RNA  
377 sequencing of BAL fluid from patients with severe COVID-19, despite low ACE2 expression  
378 in these cells (4, 23, 39).

379

380 Cellular ACE2 expression is dynamically regulated by factors such as interferons, and  
381 environmental cues within tissues, such as hypoxia (40). While we (this study) and others  
382 (23) find that resting primary human macrophages do not express ACE2 (**Figure 3A, 3B,**  
383 **3C**), it is conceivable that *in vitro* culture or *in vivo* tissue conditions might induce  
384 macrophage ACE2 expression, which explain a report of macrophage ACE2 expression (20).  
385 Ectopic ACE2 expression in other cells that do not usually express ACE2, such as endothelial  
386 cells, renders these cells susceptible and permissive to productive SARS-CoV-2 infection  
387 (28). In THP-1 cells, ACE2 overexpression indeed facilitated SARS-CoV-2 entry and early-  
388 stage replication, but in response, these cells initiated an interferon program to prevent  
389 productive infection (**Figure 3F, 3G, 5A, 6D**). This mechanism appeared to block virion  
390 production at a stage beyond genome replication (as measured by viral RNA, **Figures 3D-E**),  
391 perhaps during virion assembly or release. Thus, even if macrophages do induce ACE2  
392 expression during virus encounter, they are unlikely to act as 'trojan horses' to disseminate  
393 SARS-CoV-2 to extra-respiratory tissues. This is consistent with abortive replication of other  
394 respiratory viruses in human macrophages, including seasonal influenza A virus (41) and

395 rhinovirus (15). The molecular mechanisms underpinning why macrophages are resistant to  
396 productive respiratory virus infection, remain to be elucidated.

397

398 Macrophages are key sentinels for microbial infection and can usually detect pathogen-  
399 derived molecules with exquisite sensitivity. Our data indicates that SARS-CoV-2 evades  
400 detection by human macrophages. It is tempting to speculate that the severe disease caused  
401 by SARS-CoV-2 may partially derive from its capacity to evade macrophage detection and  
402 resultant anti-viral responses. Macrophage-derived interferon is critical for controlling other  
403 respiratory viral infections (e.g. Newcastle Disease Virus, Respiratory Syncytial Virus) (17,  
404 18), and here, cytosolic viral sensors such as retinoic acid-inducible gene-1 (RIG-I) and  
405 MDA5 induce robust interferon responses to rapidly control viral replication. In contrast,  
406 viruses that do not infect macrophages, such as SARS-CoV-2, may be able to persist and  
407 replicate for longer in the absence of a macrophage interferon response, causing ongoing  
408 epithelial and other cell damage, which may perpetuate inflammation and immunopathology.  
409 In the inflamed, SARS-CoV-2-infected lung, we expect that macrophages will sense cell  
410 ‘extrinsic’ danger by sampling the extracellular space and phagosomal compartments (42). In  
411 this scenario, macrophage cell surface (e.g., CLRs, TLR2 (23, 26)) or endosomal PRRs (e.g.  
412 TLR7/8) could sense such cell-extrinsic signals to preferentially activate pro-inflammatory  
413 signalling instead of anti-viral interferons (43), contributing to disease.

414

415 Our study indicates that SARS-CoV-2 is not sensed by human macrophages unless ACE2  
416 expression is induced, and early-stage viral replication can occur. This study gives new  
417 insight into SARS-CoV-2 cell tropism, and the influence therein of macrophage innate  
418 immune pathways. Such studies of innate immune cell-intrinsic and -extrinsic SARS-CoV-2  
419 recognition and response will help reveal novel therapeutic targets for new drugs that dampen  
420 pathogenic pro-inflammatory signalling in virulent viral infections, without impeding host  
421 anti-viral defence.

422

## 423 **MATERIALS AND METHODS**

424

### 425 **Reagents and inhibitors**

426 Low molecular weight Poly I:C (Invivogen, tlrl-picw) was transfected into cells with  
427 lipofectamine LTX (Thermofisher, A12621) at 0.5 µg pIC per well, while R848 Resiquimod

428 (Miltenyi Biotech, 130-109-376) was used at a final concentration of 250 ng/ml. The TBK1  
429 inhibitor BX-795 (Sigma-Aldrich, SML0694) was used at a final concentration of 5  $\mu$ M.

430

### 431 **Cells**

432 Peripheral blood mononuclear cells were isolated from buffy coats by density centrifugation  
433 using Ficoll-Paque Plus (GE Healthcare). CD14<sup>+</sup> monocytes were subsequently isolated  
434 using magnetic-activated cell sorting (Miltenyi Biotech), according to the manufacturer's  
435 instructions. Human macrophages were differentiated from human CD14<sup>+</sup> monocytes as  
436 previously described (44) and then used for experiments on day 7 of differentiation. Human  
437 monocyte-derived macrophages (HMDMs) were cultured in media consisting of RPMI 1640  
438 medium (Life Technologies) supplemented with 10% heat-inactivated fetal bovine serum  
439 (FBS), 2mM GlutaMAX (Life Technologies), 50 U/ml penicillin–streptomycin (Life  
440 Technologies) and 150 ng/ml recombinant human macrophage colony-stimulating factor  
441 (CSF-1, endotoxin free, expressed and purified by the University of Queensland Protein  
442 Expression Facility). HMDM were seeded 16 h prior to experiments at 500 000 cells per well  
443 in 12 well plates, or 200 000 cells per well in 24 well plates. Studies using primary human  
444 cells were approved by the University of Queensland Human Medical Research Ethics  
445 Committee. THP-1 cells (TIB-202; ATCC) were maintained in RPMI 1640 medium  
446 supplemented with 10% heat-inactivated foetal bovine serum (FBS), 2 mM GlutaMAX (Life  
447 Technologies) and 50 U/ml penicillin–streptomycin (Life Technologies). For experiments,  
448 THP-1 cells were seeded at 500 000 cells per well of a 12-well plate and differentiated for 48  
449 h with 30 ng/ml phorbol-myristate-acetate (PMA). Calu-3 cells purchased from ATCC  
450 (HTB-55) were maintained in Minimal Essential Media (Invitrogen), containing 10% heat-  
451 inactivated foetal bovine serum (Cytiva), 50 U/ml penicillin and streptomycin (Life  
452 Technologies Australia), and were seeded at 300 000 cells per well in a 12-well plate 48 h  
453 prior to experiments.

454

455 Patient bronchoalveolar lavage (BAL) was obtained at the time of diagnostic bronchoscopy  
456 as previously described (45). Briefly, the bronchoscope was wedged into a non-dependent  
457 sub-segmental bronchus (46) of a radiologically normal segment of lung, and 20 ml of  
458 normal saline was instilled, retrieved, and discarded to clear the bronchoscope of bronchial  
459 secretions. A further 80-100 ml was instilled in 20-ml aliquots and retrieved via hand  
460 aspiration of the syringe. Studies using primary human cells were approved by the Royal

461 Melbourne Hospital and University of Melbourne Human Research Ethics Committees.  
462 BAL was filtered and cells washed and seeded at  $1 \times 10^6$  cells per ml, overnight, in 48 well  
463 tissue culture plates in RPMI 1640 medium supplemented with 10% heat-inactivated foetal  
464 bovine serum (FBS), 2 mM GlutaMAX (Life Technologies) and 50 U/ml penicillin–  
465 streptomycin (Life Technologies). Non-adherent cells were removed via media change four  
466 hours post-seeding, resulting in >90% macrophage population, as described previously (47).

467

#### 468 **Lentiviral transduction**

469 A lentiviral construct containing human ACE2 (Addgene 155295), or mScarlet (Addgene  
470 85044) was cloned into pLV-CMV-MCS-IRES-Puro-Sin (48) and packaged into lentivirus in  
471 HEK-293T cells by means of third generation lentiviral packaging plasmids (49). Lentivirus-  
472 containing supernatant was harvested on day 2 and 3 after transfection. Lentivirus was  
473 concentrated by Lenti-X concentrator (Clontech, 631232). HEK-293T cells were transfected  
474 with the expression vectors according to the manufacturer's protocol with PEI 2500  
475 (BioScientific) and transduced target THP-1 cells were selected with puromycin (1  $\mu\text{g}/\text{mL}$ )  
476 after 24 h and used for assays after 72 h.

477

#### 478 **Viruses and cell infections**

479 SARS-CoV-2 isolate hCoV-19/Australia/QLD02/2020 was provided by Queensland Health  
480 Forensic & Scientific Services, Queensland Department of Health. Virus was grown on Vero  
481 E6 TMPRSS2 cells for 48 h in DMEM with 2% FBS, and cell debris was cleared by  
482 centrifugation at 500G for 5 minutes at room temperature. Virus was titred as described  
483 previously by plaque assay (28). Sanger sequencing was used to confirm that no mutations  
484 occurred in the spike gene relative to the original clinical isolate. Cells (HMDM, THP-1,  
485 Calu3) in 12 well plates (500 000 cells/well) were challenged for 1 h at 37°C and 5% CO<sub>2</sub>  
486 with  $2.5 \times 10^6$  plaque-forming units (PFUs) for MOI 5, or  $2.5 \times 10^5$  PFUs for MOI 0.5. For  
487 Calu3 cells, virus was added to cells to give a total volume of 500  $\mu\text{L}$  of RPMI 1640 with 2%  
488 FBS (HMDM and THP-1) or MEM with 2% FBS (Calu3) per well. The viral inoculum was  
489 then removed, and the medium was replaced with DMEM (Invitrogen) or MEM (Invitrogen)  
490 containing 2% FBS. Alternatively, virus was not removed from the cells. All studies with  
491 SARS-CoV-2 were performed under physical containment 3 (PC3) conditions and were  
492 approved by The University of Queensland Biosafety Committee (IBC/374B/ SCMB/2020,  
493 IBC/518B/IMB/SCMB/2022) and the University of Melbourne Institutional Biosafety

494 Committee in consultation with the Doherty Institute High Containment Facility  
495 Management Group.

496

497 For studies involving SARS-CoV-2 infection of BAL macrophages, the SARS-CoV-2 isolate  
498 hCoV-19/Australia/VIC01/2020 (kindly provided by the Victorian Infectious Diseases  
499 Reference Laboratory) was grown in Vero cells for 72 h in serum-free MEM with 1 µg/ml  
500 TPCK trypsin. The median tissue culture infectious dose (TCID<sub>50</sub>) was calculated using the  
501 Reed-Muench method. BAL macrophages (approx. 2.5 x 10<sup>5</sup> cells) were seeded overnight in  
502 48 well plates. Macrophages were infected with SARS-CoV-2 (MOI 1) in serum free media  
503 (RPMI supplemented as described above) for 1 hr. Inoculum was removed and cells were  
504 washed, before media was replaced 400 µL serum free media for a further 2 to 48 hrs. VERO  
505 control cells were infected at an MOI of 0.5 and maintenance media included 1 µg/ml of  
506 TPCK trypsin. RNA from cell free supernatant was collected and extracted using QIAamp  
507 Viral RNA Mini Kit (Qiagen) while RNA from cell monolayers was extracted via the Rneasy  
508 Plus Mini Kit (Qiagen).

509

#### 510 **Cell Death**

511 THP-1 were seeded at 50 000 cells per well of a black walled clear bottomed 96 well plate  
512 (CLS3916, Corning). After 48h of differentiation with PMA, cells were inoculated with virus  
513 at MOI 5, incubated for 1h, before media was replaced with 100 µl of fresh RPMI with 2%  
514 FCS. After 72h, ~60 µl of media was removed per well, leaving 30 µl and 30 µl of ATPlite  
515 substrate solution (Perkin Elmer) was added per well. After 10 minutes incubation at room  
516 temperature, plates were sealed with Optical Adhesive Film (Thermofisher) and  
517 luminescence was read on a Victor Nivo Plate Reader (Perkin Elmer).

518

#### 519 **RNA extraction and qPCR analysis**

520 Cells were lysed in Buffer RLT plus β-mercaptoethanol, and RNA was directly processed  
521 using the Rneasy Mini Kit (Qiagen), with on-column Dnase digestion according to  
522 manufacturer's instructions. RNA concentration was measured using a NanoDrop  
523 spectrophotometer and an equal starting concentration of RNA for each sample was used for  
524 reverse transcription. Reverse transcription was performed using Superscript III Reverse  
525 Transcriptase (ThermoFisher) with random hexamer priming. Quantitative PCR was  
526 performed using SYBR green reagent (Applied Biosystems) on a QuantStudio 7 Flex Real-



527 Time PCR System (ThermoFisher) in 384 well plates (Applied Biosystems) and relative gene  
528 expression was determined using the change-in-threshold ( $2^{-\Delta\Delta CT}$ ) method, using  
529 Hypoxanthine Phosphoribosyltransferase 1 (*Hprt*) as an endogenous control. Alternatively,  
530 gene expression was determined relative to a standard curve generated from plasmids  
531 containing SARS-CoV-2 Main Protease (Mpro). Primers are as follows: *Hprt* F:  
532 TCAGGCAGTATAATCCAAAGATGGT R: AGTCTGGCTTATATCCAACACTTCG;  
533 *Ace2* F: TCACGATTGTTGGGACTCTGC, R: TCGCTTCATCTCCCACCACT; *Il6* F:  
534 CTCAGCCCTGAGAAAGGAGACAT, R: TCAGCCATCTTTGGAAGGTTC A; *Tnf* F:  
535 TGCCTGCTGCACTTTGGAGTGA, R: AGATGATCTGACTGCCTGGGCCAG; *Il1b* F:  
536 GAAGCTGATGGCCCTAAACA, R: AAGCCCTTGCTGTAGTGGTG, *Ifnb1* F:  
537 CAGTCCTGGAAGAAAACTGGAGA, R: TTGGCCTTCAGGTAATGCAGAA; *Cxcl10*  
538 F: TGAAAGCAGTTAGCAAGGAAAGGT, R: AGCCTCTGTGTGGTCCATCC; *Ifn11* F:  
539 CGCCTTGGAAGAGTCACTCA, R: GAAGCCTCAGGTCCCAATTC; SARS-CoV-2 *Mpro*  
540 F: GAGACAGGTGGTTTCTCAATCG, R: ACGGCAATTCCAGTTTGAGC; SARS-CoV-2  
541 *E* gene F: ACAGGTACGTTAATAGTTAATAGCGT, R:  
542 ATATTGCAGCAGTACGCACACA.

543 Copy number of SARS-CoV-2 *E* gene was measured in cellular RNA (equal starting  
544 concentration of RNA) and RNA from cell culture media (equal starting volume).  
545 SensiFAST™ Probe Lo-ROX One-Step Kit with E-specific probe (FAM-  
546 AACTAGCCATCCTTACTGCGCTTCG-QQA) was used to detect *E* gene and a plasmid-  
547 based standard curves was used to quantify the number of *E* copies. The *Mpro* sequence was  
548 amplified from cDNA with the Phusion polymerase kit (New England BioLabs) using the  
549 following primers. F: AATAAGGTACCAGTGGTTTTAGAAAAATGG, R:  
550 TTATTGCGGCCGCTCATTGGAAAGTAACACC. The *Mpro* expression vector was  
551 generated by cloning the *Mpro* PCR product into a modified pEF6 plasmid, with an HA-tag  
552 N-terminal of the multiple cloning site, by standard restriction digest cloning techniques. The  
553 vector and correct insertion of *Mpro* were verified by Sanger sequencing.

554

### 555 **Cytokine analysis**

556 Cytokine titres were determined using an AlphaLISA Immunoassay kit (Perkin Elmer)  
557 according to the manufacturer's instructions and analysed on a Victor Nivo Plate Reader  
558 (Perkin Elmer).

559

## 560 **Electron Microscopy**

561 Electron Microscopy samples were processed using a method adapted from a previous study  
562 (50). Briefly cells were fixed in 2.5% glutaraldehyde (Electron Microscopy Services) in PBS  
563 for 24 h, then post fixed in 1% osmium (ProSciTech) for 1 h and contrasted with 1% aqueous  
564 uranyl acetate (Electron Microscopy Services) for 1 h. Samples were then serially dehydrated  
565 in increasing percentages of ethanol before serial infiltration with LX-112 resin (Ladd  
566 Research) in a Biowave microwave (Pelco). Ultrathin sections were attained on a  
567 ultramicrotome (UC6:Leica), and further contrasted using Reynold lead post-stain.  
568 Micrographs were acquired using a JEOL 1011 transmission microscope at 80 kV with a  
569 Morada CCD camera (Olympus) utilising iTEM software.

570

## 571 **Immunoblotting**

572 For total cell lysates, cells were washed once with PBS and lysed with RIPA buffer (50 mM  
573 Tris, 150 mM NaCl, 1 mM EDTA, 1% Triton X-100, 0.1% SDS, 1% sodium deoxycholate,  
574 protease inhibitor, pH 8.0). A Pierce BCA protein assay kit (Thermo Scientific) was used to  
575 equalise protein amounts. SDS sample buffer containing 100 mM DTT (Astral Scientific)  
576 was added, and samples were boiled at 95°C for 10 min to denature proteins. Proteins were  
577 separated on 4-15% mini protean TGX precast gels (Bio-Rad) in running buffer (200 mM  
578 Glycine, 25 mM Tris, 0.1% SDS (pH8.6)), transferred to PVDF or nitrocellulose membrane  
579 (Bio-Rad 1620112) in blot buffer (48 mM Tris, 39 mM Glycine, 0.04% SDS, 20% MeOH) and  
580 subsequently blocked with 5% (w/v) milk powder or BSA in Tris-buffered saline with  
581 Tween-20 (TBST) for 30 min. Primary antibodies were incubated overnight at 4 deg C,  
582 followed by secondary antibodies linked to horseradish peroxidase (HRP) (Cell Signalling) or  
583 AlexaFluor647 (Invitrogen), and after each step, immunoblots were washed 3x with TBST.  
584 HRP signals were visualised by enhanced chemiluminescence (ECL) (Bio-Rad) and imaged  
585 with a Vilber Fusion Imaging system (Vilber). Fluorescence signal was detected using the  
586 AI600 imager (Amersham). The following antibodies were used: SARS-CoV-2  
587 Nucleoprotein (Sino Biological), Tubulin (9F3; Cell Signalling Technology), ACE2 (AF933;  
588 RnD Systems), TMPRSS2 (Abcam) and Actin (8H10D10; Cell Signalling Technology),  
589 ACE2 (MA532307, Invitrogen), Calnexin (ab22595, Abcam).

590

## 591 **Statistical Analysis:**

592 Statistics were calculated using GraphPad Prism using tests indicated in figure legends.

593

594 **Supplementary Materials**

595

596 Figure S1: Macrophage ACE2 expression potentiates macrophage inflammatory responses to  
597 SARS-CoV-2 at MOI 0.5 (Relates to Figure 5).

598 Figure S2: BX-795 blocks anti-viral cytokine induction in THP1-ACE2 cells (Relates to  
599 Figure 6).

600

601 **ACKNOWLEDGEMENTS**

602 We gratefully acknowledge Dr Emma Gordon and Dr Lilian Schimmel for production of the  
603 ACE2 and mScarlet expressing lentiviruses and Dr Fiona Wylie for critical reading of this  
604 manuscript. This work was supported by National Health and Medical Research Council  
605 (NHMRC) of Australia funding including fellowships (1124612 to LL; 1177174 to K.  
606 Subbaro; 1156489 to RGP; 2009075 to K. Schroder) and grants (1140064 and 1150083 to  
607 RGP; 2007979 to KRS; 1184532 to SL; 2009677 to K. Schroder) and the Doherty Institute  
608 COVID-19 Agility Fund. The Melbourne WHO Collaborating Centre for Reference and  
609 Research on Influenza is supported by the Australian Government Department of Health.

610

611 **COMPETING INTERESTS:**

612 KRS is a consultant for Sanofi, Roche and NovoNordisk. K. Schroder is a co-inventor on  
613 patent applications for NLRP3 inhibitors which have been licensed to Inflazome Ltd, a  
614 company headquartered in Dublin, Ireland. Inflazome is developing drugs that target the  
615 NLRP3 inflammasome to address unmet clinical needs in inflammatory disease. K. Schroder  
616 served on the Scientific Advisory Board of Inflazome in 2016–2017, and serves as a  
617 consultant to Quench Bio, USA and Novartis, Switzerland.

618

619 **AUTHOR CONTRIBUTIONS**

620 Conception: LIL and SLL

621 Data acquisition and Analysis: LIL, KYC, XW, TE, CJS, JR, TY, CLH, SE, SF, FLM, DPS,  
622 AKL, RGP, SLL

623 Funding acquisition: LIL, SLL, K.Schroder

624 Manuscript original draft: LIL, K.Schroder

625 Manuscript editing: LIL, K.Subbarao, KRS, SLL, K.Schroder

626

627

628

629 **REFERENCES**

630

- 631 1. Y. J. Hou, K. Okuda, C. E. Edwards, D. R. Martinez, K. H. Dinno, T. Kato, R. E.  
632 Lee, B. L. Yount, T. M. Mascenik, G. Chen, K. N. Olivier, A. Ghio, V. Longping, S.  
633 R. Leist, L. E. Gralinski, A. Schäfer, H. Dang, S. Nakano, L. Sun, M. L. Fulcher, A.  
634 Livraghi-butrico, N. I. Nicely, M. Cameron, C. Cameron, D. J. Kelvin, A. De, D. M.  
635 Margolis, A. Markmann, L. Bartelt, R. Zumwalt, J. Martinez, S. P. Salvatore, A.  
636 Borczuk, P. R. Tata, A. Kimple, I. Jaspers, W. K. O. Neal, S. H. Randell, C. Richard,  
637 R. S. Baric, SARS-CoV-2 Reverse Genetics Reveals a Variable Infection Gradient in  
638 the Respiratory Tract. *Cell* (2020), doi:10.1016/j.cell.2020.05.042.
- 639 2. D. Blanco-Melo, B. E. Nilsson-Payant, W.-C. Liu, S. Uhl, D. Hoagland, R. Møller, T.  
640 X. Jordan, K. Oishi, M. Panis, D. Sachs, T. T. Wang, R. E. Schwartz, J. K. Lim, R. A.  
641 Albrecht, B. R. Tenover, Imbalanced host response to SARS-CoV-2 drives  
642 development of COVID-19. *Cell*, 1–10 (2020).
- 643 3. L. G. Thorne, A. Reuschl, L. Zuliani-Alvarez, M. V. X. Whelan, J. Turner, M.  
644 Noursadeghi, C. Jolly, G. J. Towers, SARS-CoV-2 sensing by RIG-I and MDA5 links  
645 epithelial infection to macrophage inflammation. *EMBO J.*, 1–17 (2021).
- 646 4. P. Bost, A. Giladi, Y. Liu, Y. Bendjelal, G. Xu, E. David, R. Blecher-Gonen, M.  
647 Cohen, C. Medaglia, H. Li, A. Deczkowska, S. Zhang, B. Schwikowski, Z. Zhang, I.  
648 Amit, Host-viral infection maps reveal signatures of severe COVID-19 patients. *Cell*  
649 (2020), doi:10.1016/j.cell.2020.05.006.
- 650 5. R. L. Chua, S. Lukassen, S. Trump, B. P. Hennig, D. Wendisch, F. Pott, O. Debnath,  
651 L. Thürmann, F. Kurth, M. T. Völker, J. Kazmierski, B. Timmermann, S. Twardziok,  
652 S. Schneider, F. Machleidt, H. Müller-Redetzky, M. Maier, A. Krannich, S. Schmidt,  
653 F. Balzer, J. Liebig, J. Loske, N. Suttorp, J. Eils, N. Ishaque, U. G. Liebert, C. von  
654 Kalle, A. Hocke, M. Wizenrath, C. Goffinet, C. Drosten, S. Laudi, I. Lehmann, C.  
655 Conrad, L. E. Sander, R. Eils, COVID-19 severity correlates with airway epithelium–  
656 immune cell interactions identified by single-cell analysis. *Nat. Biotechnol.* **38**, 970–  
657 979 (2020).
- 658 6. R. Knoll, J. L. Schultze, J. Schulte-Schrepping, Monocytes and Macrophages in  
659 COVID-19. *Front. Immunol.* **12**, 1–12 (2021).
- 660 7. M. Merad, J. C. Martin, Pathological inflammation in patients with COVID-19: a key  
661 role for monocytes and macrophages. *Nat. Rev. Immunol.* **20**, 355–362 (2020).
- 662 8. J. Zheng, Y. Wang, K. Li, D. K. Meyerholz, C. Allamargot, S. Perlman, Severe Acute  
663 Respiratory Syndrome Coronavirus 2-Induced Immune Activation and Death of  
664 Monocyte-Derived Human Macrophages and Dendritic Cells. *J. Infect. Dis.* **223**, 785–  
665 795 (2021).
- 666 9. D. Yang, H. Chu, Y. Hou, Y. Chai, H. Shuai, A. C. Y. Lee, X. Zhang, Y. Wang, B.  
667 Hu, X. Huang, T. T. T. Yuen, J. P. Cai, J. Zhou, S. Yuan, A. J. Zhang, J. F. W. Chan,  
668 K. Y. Yuen, Attenuated interferon and proinflammatory response in SARS-CoV-2-  
669 infected human dendritic cells is associated with viral antagonism of STAT1  
670 phosphorylation. *J. Infect. Dis.* **222**, 734–745 (2020).
- 671 10. M. Hoffmann, H. Kleine-Weber, S. Schroeder, M. A. Mü, C. Drosten, S. Pö, N. Krü,  
672 T. Herrler, S. Erichsen, T. S. Schiergens, G. Herrler, N.-H. Wu, A. Nitsche, S. Pö  
673 Hlmann, SARS-CoV-2 Cell Entry Depends on ACE2 and TMPRSS2 and Is Blocked  
674 by a Clinically Proven Protease Inhibitor Article SARS-CoV-2 Cell Entry Depends on  
675 ACE2 and TMPRSS2 and Is Blocked by a Clinically Proven Protease Inhibitor. *Cell.*  
676 **181**, 1–10 (2020).
- 677 11. C. B. Jackson, M. Farzan, B. Chen, H. Choe, Mechanisms of SARS-CoV-2 entry into  
678 cells. *Nat. Rev. Mol. Cell Biol.* **0123456789** (2021), doi:10.1038/s41580-021-00418-x.

- 679 12. P. V'kovski, A. Kratzel, S. Steiner, H. Stalder, V. Thiel, Coronavirus biology and  
680 replication: implications for SARS-CoV-2. *Nat. Rev. Microbiol.* **19**, 155–170 (2021).
- 681 13. B. Meng, A. Abdullahi, I. A. T. M. Ferreira, N. Goonawardane, A. Saito, I. Kimura, D.  
682 Yamasoba, P. P. Gerber, S. Fatihi, S. Rathore, S. K. Zepeda, G. Papa, S. A. Kemp, T.  
683 Ikeda, M. Toyoda, T. S. Tan, J. Kuramochi, S. Mitsunaga, T. Ueno, K. Shirakawa, A.  
684 Takaori-Kondo, T. Brevini, D. L. Mallery, O. J. Charles, CITIID-NIHR BioResource  
685 COVID- Collaboration, Genotype to Phenotype Japan (GP-Japan) Consortium  
686 members, Ecuador-COVID19 Consortium, J. E. Bowen, A. Joshi, A. C. Walls, L.  
687 Jackson, D. Martin, K. G. C. Smith, J. Bradley, J. A. G. Briggs, J. Choi, E. Madissoon,  
688 K. Meyer, P. Mlcochova, L. Ceron-Gutierrez, R. Doffinger, S. A. Teichmann, A. J.  
689 Fisher, M. S. Pizzuto, A. de Marco, D. Corti, M. Hosmillo, J. H. Lee, L. C. James, L.  
690 Thukral, D. Veessler, A. Sigal, F. Sampaziotis, I. G. Goodfellow, N. J. Matheson, K.  
691 Sato, R. K. Gupta, Altered TMPRSS2 usage by SARS-CoV-2 Omicron impacts  
692 tropism and fusogenicity. *Nature* (2022), doi:10.1038/s41586-022-04474-x.
- 693 14. K. R. Short, A. G. Brooks, P. C. Reading, S. L. Londrigan, The fate of influenza A  
694 virus after infection of human macrophages and dendritic cells. *J. Gen. Virol.* **93**,  
695 2315–2325 (2012).
- 696 15. J. E. Gern, E. C. Dick, W. M. Lee, S. Murray, K. Meyer, Z. T. Handzel, W. W. Busse,  
697 Rhinovirus enters but does not replicate inside monocytes and airway macrophages. *J.*  
698 *Immunol.* **156**, 621–7 (1996).
- 699 16. S. L. Londrigan, L. M. Wakim, J. Smith, A. J. Haverkate, A. G. Brooks, P. C. Reading,  
700 IFITM3 and type I interferons are important for the control of influenza A virus  
701 replication in murine macrophages. *Virology.* **540**, 17–22 (2020).
- 702 17. M. Goritzka, S. Makris, F. Kausar, L. R. Durant, C. Pereira, Y. Kumagai, F. J. Culley,  
703 M. Mack, S. Akira, C. Johansson, Alveolar macrophage-derived type I interferons  
704 orchestrate innate immunity to RSV through recruitment of antiviral monocytes. *J.*  
705 *Exp. Med.* **212**, 699–714 (2015).
- 706 18. Y. Kumagai, O. Takeuchi, H. Kato, H. Kumar, K. Matsui, E. Morii, K. Aozasa, T.  
707 Kawai, S. Akira, Alveolar Macrophages Are the Primary Interferon- $\alpha$  Producer in  
708 Pulmonary Infection with RNA Viruses. *Immunity.* **27**, 240–252 (2007).
- 709 19. C. Schneider, S. P. Nobs, A. K. Heer, M. Kurrer, G. Klinke, N. van Rooijen, J. Vogel,  
710 M. Kopf, Alveolar Macrophages Are Essential for Protection from Respiratory Failure  
711 and Associated Morbidity following Influenza Virus Infection. *PLoS Pathog.* **10**  
712 (2014), doi:10.1371/journal.ppat.1004053.
- 713 20. M. M. Abdelmoaty, P. Yeapuri, J. Machhi, K. E. Olson, F. Shahjin, V. Kumar, Y.  
714 Zhou, J. Liang, K. Pandey, A. Acharya, S. N. Byrareddy, R. L. Mosley, H. E.  
715 Gendelman, Defining the Innate Immune Responses for SARS-CoV-2-Human  
716 Macrophage Interactions. *Front. Immunol.* **12**, 1–15 (2021).
- 717 21. L. Dalskov, M. Møhlenberg, J. Thyrssted, J. Blay-Cadanet, E. T. Poulsen, B. H.  
718 Folkersen, S. H. Skaarup, D. Olgarnier, L. Reinert, J. J. Enghild, H. J. Hoffmann, C. K.  
719 Holm, R. Hartmann, SARS-CoV-2 evades immune detection in alveolar macrophages.  
720 *EMBO Rep.* **21**, 1–10 (2020).
- 721 22. M. A. Niles, P. Gogesch, S. Kronhart, S. Ortega Iannazzo, G. Kochs, Z. Waibler, M.  
722 Anzaghe, Macrophages and Dendritic Cells Are Not the Major Source of Pro-  
723 Inflammatory Cytokines Upon SARS-CoV-2 Infection. *Front. Immunol.* **12**, 1–12  
724 (2021).
- 725 23. Q. Lu, J. Liu, S. Zhao, M. F. Gomez Castro, M. Laurent-Rolle, J. Dong, X. Ran, P.  
726 Damani-Yokota, H. Tang, T. Karakousi, J. Son, M. E. Kaczmarek, Z. Zhang, S. T.  
727 Yeung, B. T. McCune, R. E. Chen, F. Tang, X. Ren, X. Chen, J. C. C. Hsu, M.  
728 Teplova, B. Huang, H. Deng, Z. Long, T. Mudianto, S. Jin, P. Lin, J. Du, R. Zang, T.

- 729 T. Su, A. Herrera, M. Zhou, R. Yan, J. Cui, J. Zhu, Q. Zhou, T. Wang, J. Ma, S. B.  
730 Koralov, Z. Zhang, I. Aifantis, L. N. Segal, M. S. Diamond, K. M. Khanna, K. A.  
731 Stapleford, P. Cresswell, Y. Liu, S. Ding, Q. Xie, J. Wang, SARS-CoV-2 exacerbates  
732 proinflammatory responses in myeloid cells through C-type lectin receptors and  
733 Tweety family member 2. *Immunity*. **54**, 1304-1319.e9 (2021).
- 734 24. C. Lucas, P. Wong, J. Klein, T. B. R. Castro, J. Silva, M. Sundaram, M. K. Ellingson,  
735 T. Mao, J. E. Oh, B. Israelow, T. Takahashi, M. Tokuyama, P. Lu, A. Venkataraman,  
736 A. Park, S. Mohanty, H. Wang, A. L. Wyllie, C. B. F. Vogels, R. Earnest, S. Lapidus,  
737 I. M. Ott, A. J. Moore, M. C. Muenker, J. B. Fournier, M. Campbell, C. D. Odio, A.  
738 Casanovas-Massana, A. Obaid, A. Lu-Culligan, A. Nelson, A. Brito, A. Nunez, A.  
739 Martin, A. Watkins, B. Geng, C. Kalinich, C. Harden, C. Todeasa, C. Jensen, D. Kim,  
740 D. McDonald, D. Shepard, E. Courchaine, E. B. White, E. Song, E. Silva, E. Kudo, G.  
741 DeIuliis, H. Rahming, H. J. Park, I. Matos, J. Nouws, J. Valdez, J. Fauver, J. Lim, K.  
742 A. Rose, K. Anastasio, K. Brower, L. Glick, L. Sharma, L. Sewanan, L. Knaggs, M.  
743 Minasyan, M. Batsu, M. Petrone, M. Kuang, M. Nakahata, M. Campbell, M. Linehan,  
744 M. H. Askenase, M. Simonov, M. Smolgovsky, N. Sonnert, N. Naushad, P.  
745 Vijayakumar, R. Martinello, R. Datta, R. Handoko, S. Bermejo, S. Prophet, S.  
746 Bickerton, S. Velazquez, T. Alpert, T. Rice, W. Khoury-Hanold, X. Peng, Y. Yang, Y.  
747 Cao, Y. Strong, R. Herbst, A. C. Shaw, R. Medzhitov, W. L. Schulz, N. D. Grubaugh,  
748 C. Dela Cruz, S. Farhadian, A. I. Ko, S. B. Omer, A. Iwasaki, Longitudinal analyses  
749 reveal immunological misfiring in severe COVID-19. *Nature*. **584**, 463–469 (2020).
- 750 25. M. Koutsakos, L. C. Rowntree, L. Hensen, B. Y. Chua, C. E. van de Sandt, J. R.  
751 Habel, W. Zhang, X. Jia, L. Kedzierski, T. M. Ashhurst, G. H. Putri, F. Marsh-  
752 Wakefield, M. N. Read, D. N. Edwards, E. B. Clemens, C. Y. Wong, F. L. Mordant, J.  
753 A. Juno, F. Amanat, J. Audsley, N. E. Holmes, C. L. Gordon, O. C. Smibert, J. A.  
754 Trubiano, C. M. Hughes, M. Catton, J. T. Denholm, S. Y. Tong, D. L. Doolan, T. C.  
755 Kotsimbos, D. C. Jackson, F. Krammer, D. I. Godfrey, A. W. Chung, N. J. King, S. R.  
756 Lewin, A. K. Wheatley, S. J. Kent, K. Subbarao, J. McMahon, I. Thevarajan, T. H.  
757 Nguyen, A. C. Cheng, K. Kedzierska, Integrated immune dynamics define correlates  
758 of COVID-19 severity and antibody responses. *Cell Reports Med.*, 100208 (2021).
- 759 26. M. Zheng, R. Karki, E. P. Williams, D. Yang, E. Fitzpatrick, P. Vogel, C. B. Jonsson,  
760 T. D. Kanneganti, TLR2 senses the SARS-CoV-2 envelope protein to produce  
761 inflammatory cytokines. *Nat. Immunol.* **22**, 829–838 (2021).
- 762 27. C. Blériot, S. Chakarov, F. Ginhoux, Determinants of Resident Tissue Macrophage  
763 Identity and Function. *Immunity*. **52**, 957–970 (2020).
- 764 28. L. Schimmel, K. Y. Chew, C. J. Stocks, T. E. Yordanov, P. Essebier, A. Kulasinghe, J.  
765 Monkman, A. F. R. Santos Miggiolaro, C. Cooper, L. Noronha, K. Schroder, A. K.  
766 Legendijk, L. I. Labzin, K. R. Short, E. J. Gordon, Endothelial cells are not  
767 productively infected by SARS-CoV-2. *Clin. Transl. Immunol.* **10**, 1–18 (2021).
- 768 29. L. I. Labzin, M. Bottermann, P. Rodriguez-Silvestre, S. Foss, J. T. Andersen, M.  
769 Vaysburd, D. Clift, L. C. James, Antibody and DNA sensing pathways converge to  
770 activate the inflammasome during primary human macrophage infection. *EMBO J.* **38**,  
771 e101365 (2019).
- 772 30. S. S. Diebold, T. Kaisho, H. Hemmi, S. Akira, C. Reis E Sousa, Innate Antiviral  
773 Responses by Means of TLR7-Mediated Recognition of Single-Stranded RNA.  
774 *Science (80-. )*. **303**, 1529–1531 (2004).
- 775 31. M. Weber, A. Gawanbacht, M. Habjan, A. Rang, C. Borner, A. M. Schmidt, S.  
776 Veitinger, R. Jacob, S. Devignot, G. Kochs, A. García-Sastre, F. Weber, Incoming  
777 RNA virus nucleocapsids containing a 5'-triphosphorylated genome activate RIG-I and  
778 antiviral signaling. *Cell Host Microbe*. **13**, 336–346 (2013).

- 779 32. C. Junqueira, Â. Crespo, S. Ranjbar, J. Ingber, B. Parry, S. Ravid, L. B. de Lacerda,  
780 M. Lewandrowski, S. Clark, F. Ho, S. M. Vora, V. Leger, C. Beakes, J. Margolin, N.  
781 Russell, L. Gehrke, U. Das Adhikari, L. Henderson, E. Janssen, D. Kwon, C. Sander,  
782 J. Abraham, M. Filbin, M. B. Goldberg, H. Wu, G. Mehta, S. Bell, A. E. Goldfeld, J.  
783 Lieberman, SARS-CoV-2 infects blood monocytes to activate NLRP3 and AIM2  
784 inflammasomes, pyroptosis and cytokine release. *medRxiv Prepr. Serv. Heal. Sci.*  
785 (2021), doi:10.1101/2021.03.06.21252796.
- 786 33. J. W. Schoggins, Interferon-stimulated genes: Roles in viral pathogenesis. *Curr. Opin.*  
787 *Virol.* **6**, 40–46 (2014).
- 788 34. K. Clark, L. Plater, M. Peggie, P. Cohen, Use of the pharmacological inhibitor BX795  
789 to study the regulation and physiological roles of TBK1 and IκB Kinase ε: A distinct  
790 upstream kinase mediates ser-172 phosphorylation and activation. *J. Biol. Chem.* **284**,  
791 14136–14146 (2009).
- 792 35. K. M. Franz, J. C. Kagan, Innate Immune Receptors as Competitive Determinants of  
793 Cell Fate. *Mol. Cell.* **66**, 750–760 (2017).
- 794 36. A. Iwasaki, P. S. Pillai, Innate immunity to influenza virus infection. *Nat. Rev.*  
795 *Immunol.* **14**, 315–328 (2014).
- 796 37. Q. Niu, L. Ma, S. Zhu, L. Li, Q. Zheng, J. Hou, H. Lian, L. Wu, X. Yan, Quantitative  
797 Assessment of the Physical Virus Titer and Purity by Ultrasensitive Flow Virometry.  
798 *Angew. Chemie - Int. Ed.* **60**, 9351–9356 (2021).
- 799 38. O. García-Nicolás, P. V'kovski, F. Zettl, G. Zimmer, V. Thiel, A. Summerfield, No  
800 Evidence for Human Monocyte-Derived Macrophage Infection and Antibody-  
801 Mediated Enhancement of SARS-CoV-2 Infection. *Front. Cell. Infect. Microbiol.* **11**,  
802 1–10 (2021).
- 803 39. R. A. Grant, L. Morales-Nebreda, N. S. Markov, S. Swaminathan, M. Querrey, E. R.  
804 Guzman, D. A. Abbott, H. K. Donnelly, A. Donayre, I. A. Goldberg, Z. M. Klug, N.  
805 Borkowski, Z. Lu, H. Kihshen, Y. Politanska, L. Sichizya, M. Kang, A. Shilatifard, C.  
806 Qi, J. W. Lomasney, A. C. Argento, J. M. Kruser, E. S. Malsin, C. O. Pickens, S. B.  
807 Smith, J. M. Walter, A. E. Pawlowski, D. Schneider, P. Nannapaneni, H. Abdala-  
808 Valencia, A. Bharat, C. J. Gottardi, G. R. S. Budinger, A. V. Misharin, B. D. Singer,  
809 R. G. Wunderink, R. A. Grant, L. Morales-Nebreda, N. S. Markov, S. Swaminathan,  
810 M. Querrey, E. R. Guzman, D. A. Abbott, H. K. Donnelly, A. Donayre, I. A.  
811 Goldberg, Z. M. Klug, N. Borkowski, Z. Lu, H. Kihshen, Y. Politanska, L. Sichizya,  
812 M. Kang, A. Shilatifard, C. Qi, J. W. Lomasney, A. C. Argento, J. M. Kruser, E. S.  
813 Malsin, C. O. Pickens, S. B. Smith, J. M. Walter, A. E. Pawlowski, D. Schneider, P.  
814 Nannapaneni, H. Abdala-Valencia, A. Bharat, C. J. Gottardi, G. R. S. Budinger, A. V.  
815 Misharin, B. D. Singer, R. G. Wunderink, A. A. Wagh, A. R. Hauser, A. R. Wolfe, A.  
816 Thakrar, A. V. Yeldandi, A. A. Wang, A. R. Levenson, A. M. Joudi, B. Tran, C. A.  
817 Gao, C. Kurihara, C. J. Schroedl, C. M. Horvath, D. Meza, D. D. Odell, D. W. Kamp,  
818 D. R. Winter, E. A. Ozer, E. D. Shanes, E. T. Bartom, E. J. Rendleman, E. M.  
819 Leibenguth, F. Wehbe, G. Y. Liu, G. T. Gadhvi, H. T. Navarro, J. I. Sznajder, J. E.  
820 Dematte, J. Le, J. M. Arnold, J. C. Du, J. Coleman, J. I. Bailey, J. S. Deters, J. A.  
821 Fiala, J. Starren, K. M. Ridge, K. Secunda, K. Aren, K. L. Gates, K. Todd, L. D.  
822 Gradone, L. N. Textor, L. F. Wolfe, L. L. Pesce, L. A. Nunes Amaral, M. L.  
823 Rosenbaum, M. Kandpal, M. Jain, M. A. Sala, M. Saine, M. Carns, M. J. Alexander,  
824 M. J. Cuttica, M. H. Prickett, N. H. Khan, N. S. Chandel, N. D. Soulakis, O. R. Rivas,  
825 P. C. Seed, P. A. Reyfman, P. D. Go, P. H. S. Sporn, P. R. Cooper, R. Tomic, R. Patel,  
826 R. Garza-Castillon, R. Kalhan, R. I. Morimoto, R. J. Mylvaganam, S. S. Kim, S. W.  
827 M. Gatesy, S. Thakkar, S. Ben Maamar, S. H. Han, S. R. Rosenberg, S. Nozick, S. J.  
828 Green, S. R. Russell, T. A. Poor, T. J. Zak, T. A. Lombardo, T. Stoeger, T. Shamaly,

- 829 Z. Ren, Circuits between infected macrophages and T cells in SARS-CoV-2  
830 pneumonia. *Nature*. **590**, 635–641 (2021).
- 831 40. T. H. Beacon, G. P. Delcuve, J. R. Davie, Epigenetic regulation of ACE2, the receptor  
832 of the SARS-CoV-2 virus. *Genome*. **64**, 386–399 (2021).
- 833 41. S. L. Londrigan, K. R. Short, J. Ma, L. Gillespie, S. P. Rockman, A. G. Brooks, P. C.  
834 Reading, Infection of Mouse Macrophages by Seasonal Influenza Viruses Can Be  
835 Restricted at the Level of Virus Entry and at a Late Stage in the Virus Life Cycle. *J.*  
836 *Viol.* **89**, 12319–12329 (2015).
- 837 42. T. Flerlage, D. F. Boyd, V. Meliopoulos, P. G. Thomas, S. Schultz-Cherry, Influenza  
838 virus and SARS-CoV-2: pathogenesis and host responses in the respiratory tract. *Nat.*  
839 *Rev. Microbiol.* **0123456789** (2021), doi:10.1038/s41579-021-00542-7.
- 840 43. K. D. Hulme, E. C. Noye, K. R. Short, L. I. Labzin, Dysregulated Inflammation  
841 During Obesity: Driving Disease Severity in Influenza Virus and SARS-CoV-2  
842 Infections. *Front. Immunol.* **12**, 1–25 (2021).
- 843 44. R. C. Coll, J. R. Hill, C. J. Day, A. Zamoshnikova, D. Boucher, N. L. Massey, J. L.  
844 Chitty, J. A. Fraser, M. P. Jennings, A. A. B. Robertson, K. Schroder, MCC950  
845 directly targets the NLRP3 ATP-hydrolysis motif for inflammasome inhibition. *Nat.*  
846 *Chem. Biol.* **15**, 556–559 (2019).
- 847 45. E. Tsantikos, M. Lau, C. M. N. Castellino, M. J. Maxwell, S. L. Passey, M. J. Hansen,  
848 N. E. McGregor, N. A. Sims, D. P. Steinfurt, L. B. Irving, G. P. Anderson, M. L.  
849 Hibbs, Granulocyte-CSF links destructive inflammation and comorbidities in  
850 obstructive lung disease. *J. Clin. Invest.* **128**, 2406–2418 (2018).
- 851 46. N. Radhakrishna, M. Farmer, D. P. Steinfurt, P. King, A Comparison of Techniques  
852 for Optimal Performance of Bronchoalveolar Lavage. *J. Bronchol. Interv. Pulmonol.*  
853 **22**, 300–305 (2015).
- 854 47. J. Q. Davies, S. Gordon, C. D. Helgason, C. L. Miller, Eds. (Humana Press, Totowa,  
855 NJ, 2005; <https://doi.org/10.1385/1-59259-838-2:105>), pp. 105–116.
- 856 48. L. Schimmel, M. van der Stoel, C. Rianna, A. M. van Stalborch, A. de Ligt, M.  
857 Hoogenboezem, S. Tol, J. van Rijssel, R. Szulcek, H. J. Bogaard, P. Hofmann, R.  
858 Boon, M. Radmacher, V. de Waard, S. Huveneers, J. D. van Buul, Stiffness-Induced  
859 Endothelial DLC-1 Expression Forces Leukocyte Spreading through Stabilization of  
860 the ICAM-1 Adhesome. *Cell Rep.* **24**, 3115–3124 (2018).
- 861 49. T. Dull, R. Zufferey, M. Kelly, R. J. Mandel, M. Nguyen, D. Trono, L. Naldini, A  
862 Third-Generation Lentivirus Vector with a Conditional Packaging System. *J. Virol.* **72**,  
863 8463–8471 (1998).
- 864 50. M. T. Howes, M. Kirkham, J. Riches, K. Cortese, P. J. Walser, F. Simpson, M. M.  
865 Hill, A. Jones, R. Lundmark, M. R. Lindsay, D. J. Hernandez-Deviez, G. Hadzic, A.  
866 McCluskey, R. Bashir, L. Liu, P. Pilch, H. McMahan, P. J. Robinson, J. F. Hancock,  
867 S. Mayor, R. G. Parton, Clathrin-independent carriers form a high capacity endocytic  
868 sorting system at the leading edge of migrating cells. *J. Cell Biol.* **190**, 675–691  
869 (2010).

870  
871



872 **FIGURE LEGENDS**

873

874 **Figure 1: SARS-CoV-2 does not trigger inflammatory responses from primary human**  
875 **macrophages.**

876 A: HMDM were infected with SARS-CoV-2 (MOI 5) or stimulated with R848 or  
877 transfected pIC for 24h. Cytokines in cell supernatants were analysed by alphaLISA.  
878 Each data point represents an individual donor (n = 6-15). Graphs show mean + SEM  
879 and significance is indicated by asterisks (one-way ANOVA, Dunnett's multiple  
880 comparison test). B: HMDM were challenged with SARS-CoV-2 (MOI 0.5, 5), or  
881 transfected pIC. Gene expression at 2 and 24h was analysed by qPCR. Graphs shown  
882 mean + SEM, where each data point represents an individual donor (n = 3) and  
883 significance is indicated by asterisks:  $p \leq 0.05$  (\*),  $p \leq 0.001$  (\*\*),  $p \leq 0.0001$  (\*\*\*)  
884 (two-way ANOVA, Dunnett's multiple comparison test).

885

886 **Figure 2: Primary human monocyte-derived or airway macrophages isolated from**  
887 **bronchoalveolar lavage (BAL) do not support SARS-CoV-2 replication.**

888 A-B: Calu3 cells (A) or HMDM (B) were infected as indicated and virus was left on  
889 the cells. Viral RNA isolated from cells was measured by qPCR. Graphs show mean  
890 + SEM and each individual point represents an independent experiment (Calu3; n=3)  
891 or independent donors (HMDM; n = 7). Significance is indicated by asterisks:  $p \leq$   
892  $0.05$  (\*),  $p \leq 0.001$  (\*\*),  $p \leq 0.0001$  (\*\*\*) (two-way ANOVA, Tukey's multiple  
893 comparison test). C-D: Immunoblots of Calu3 cells (C) or HMDM (D) that were  
894 infected as indicated, with virus remaining on the cells. Blot is representative of three  
895 independent experiments (Calu3) or three independent donors (HMDM). E-F: BAL  
896 macrophages (MOI 1) or Vero cells (MOI 0.5) were infected with SARS-CoV-2 for 1  
897 h, before virus was removed and cell-associated viral RNA (E) or viral RNA released  
898 in cell-free supernatants (F) was analysed by qPCR of SARS-CoV-2 E gene at 2 and  
899 48 h post-infection. Data are mean + SEM, with each individual point representing an  
900 individual donor (BAL macrophages; n=5) or independent experiments (VERO; n=2).  
901 Significance is indicated by asterisks:  $p \leq 0.05$  (\*),  $p \leq 0.001$  (\*\*),  $p \leq 0.0001$  (\*\*\*)  
902 (one-way ANOVA, Tukey's multiple comparison test).

903

904 **Figure 3: Macrophage susceptibility to SARS-CoV-2 requires ACE-2 expression.**

905 A: HMDM and THP-1 cells were analysed by qPCR for ACE2 mRNA expression,  
906 with each data point showing an independent donor or experiment (n=3). B: HMDM  
907 were stimulated with IFN $\beta$  (10 ng/ml) for 6 h and protein extracts were analysed by  
908 immunoblot, alongside extracts from THP-1 cells (WT, THP-1-ACE2, THP-1-mSc).  
909 C: BAL macrophages from 3 donors were adhered overnight and lysed. Expression of  
910 ACE2 in BAL macrophages was analysed by immunoblot, relative to a loading  
911 control (Calnexin). Lysate from A549-cells overexpressing ACE2 were used as a  
912 positive control. D-E: Cells were infected with SARS-CoV-2 at MOI 0.5 or MOI 5.  
913 After 1h the virus inoculum was removed, cells were washed and cells or supernatants  
914 harvested at the indicated times. Cellular viral mRNA was analysed by qPCR (D-E),  
915 and infectious virions released into cell supernatants were measured by plaque assay  
916 (F-G). Data show the mean + SEM of 3-5 independent experiments, with data points  
917 representing individual experiments. Significance is indicated by asterisks:  $p \leq 0.05$   
918 (\*),  $p \leq 0.001$  (\*\*),  $p \leq 0.0001$  (\*\*\*) (two-way ANOVA, Tukey's multiple  
919 comparison test).

920

#### 921 **Figure 4: Macrophages can take up SARS-CoV-2 independently of ACE2**

922 A-D: Transmission Electron Microscopy of indicated cells infected with SARS-CoV-  
923 2 (MOI 20) at indicated timepoints. For low magnification images (A,C) scale bar =  
924 10  $\mu$ m, for all other images (A', B, C', D) scale bar = 500 nm.

925

#### 926 **Figure 5: Macrophage ACE2 expression potentiates macrophage inflammatory** 927 **responses to SARS-CoV-2**

928 A-B: THP-1-ACE-2 and THP-1-mSc cells (A) or Calu3 cells (B) were infected with  
929 SARS-CoV-2 at MOI 5. After 1 h incubation, the virus was removed, and the media  
930 replaced. Cells were harvested at the indicated times and gene expression was  
931 quantified by qPCR. Gene expression at each time point is presented relative to the  
932 mock control to show fold gene induction. Data are mean + SEM of 4 independent  
933 experiments (indicated by individual data points) and significance is indicated by  
934 asterisks:  $p \leq 0.05$  (\*),  $p \leq 0.001$  (\*\*),  $p \leq 0.0001$  (\*\*\*) (two-way ANOVA, Tukey's  
935 multiple comparison test).

936

937 **Figure 6: Blocking cytokine signalling in ACE2-macrophages rescues productive virion**  
938 **release**

939 A: THP-1 cells were infected with SARS-CoV-2 (MOI 5), which was washed away  
940 after 1 h, and incubated for a further 72h, after which cell death was analysed by  
941 ATPlite assay. Data are presented as cell viability relative to mock, and are mean +  
942 SEM of 3 independent experiments. Significance is indicated by asterisks:  $p \leq 0.05$   
943 (\*),  $p \leq 0.001$  (\*\*),  $p \leq 0.0001$  (\*\*\*) (two-way ANOVA, Tukey's multiple  
944 comparison test). B: Schematic of TBK1 (BX-795) inhibition. C-F: THP-1-ACE2 or  
945 Calu3 cells were stimulated with SARS-CoV-2 at MOI 5. After 1 h, the viral  
946 inoculum was removed and BX-795 added. Supernatants were harvested at 72 h and  
947 CXCL10 was analysed by ELISA (C) and viral titres were analysed by plaque assay  
948 (D,E). Data show mean + SEM of at least 3 independent experiments, with each  
949 individual data point representing a different experiment. Significance is indicated by  
950 asterisks:  $p \leq 0.05$  (\*),  $p \leq 0.001$  (\*\*),  $p \leq 0.0001$  (\*\*\*) (C: one-way ANOVA,  
951 Tukey's multiple comparison test; D,E: ratio-paired t-test).  
952



Figure 2

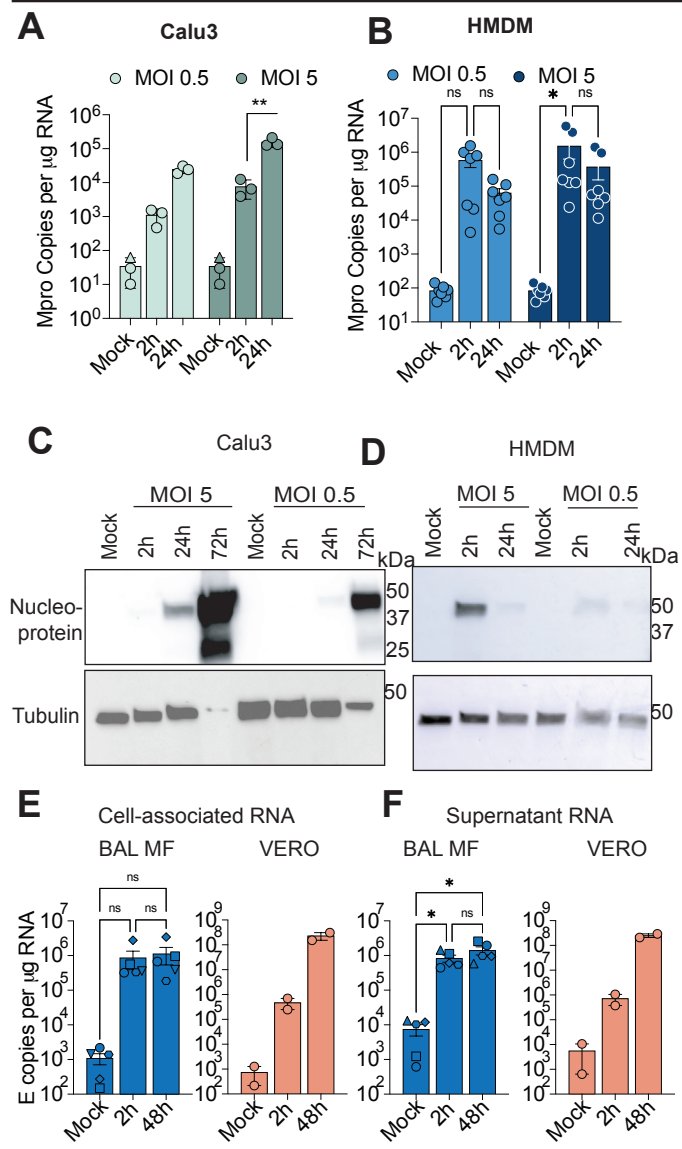

Figure 3

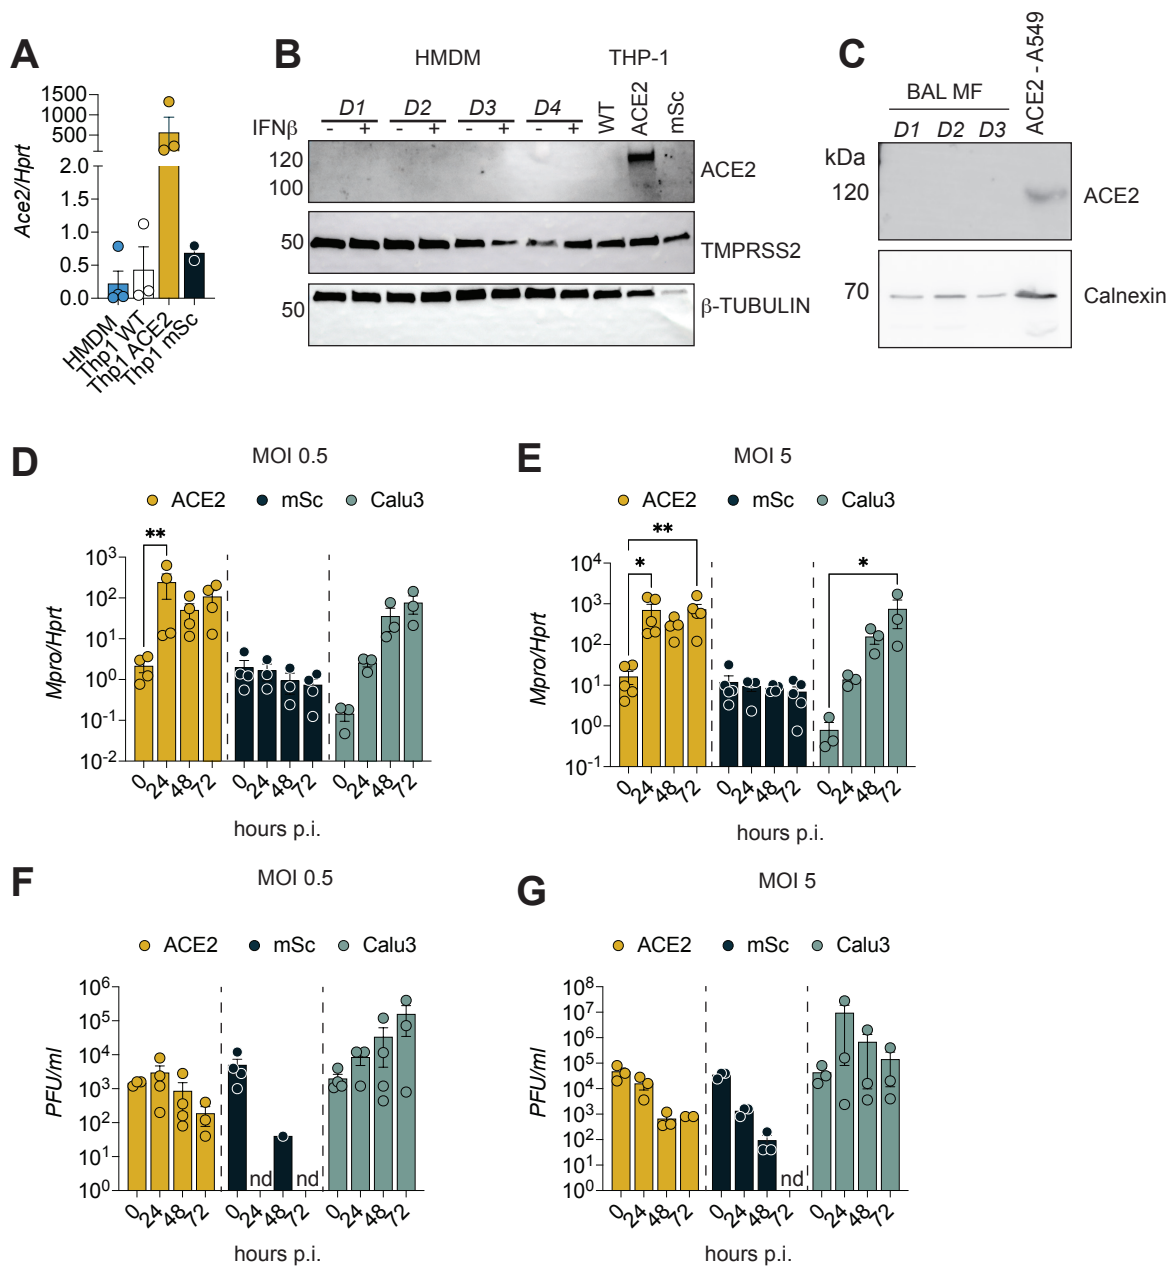

**Figure 4**

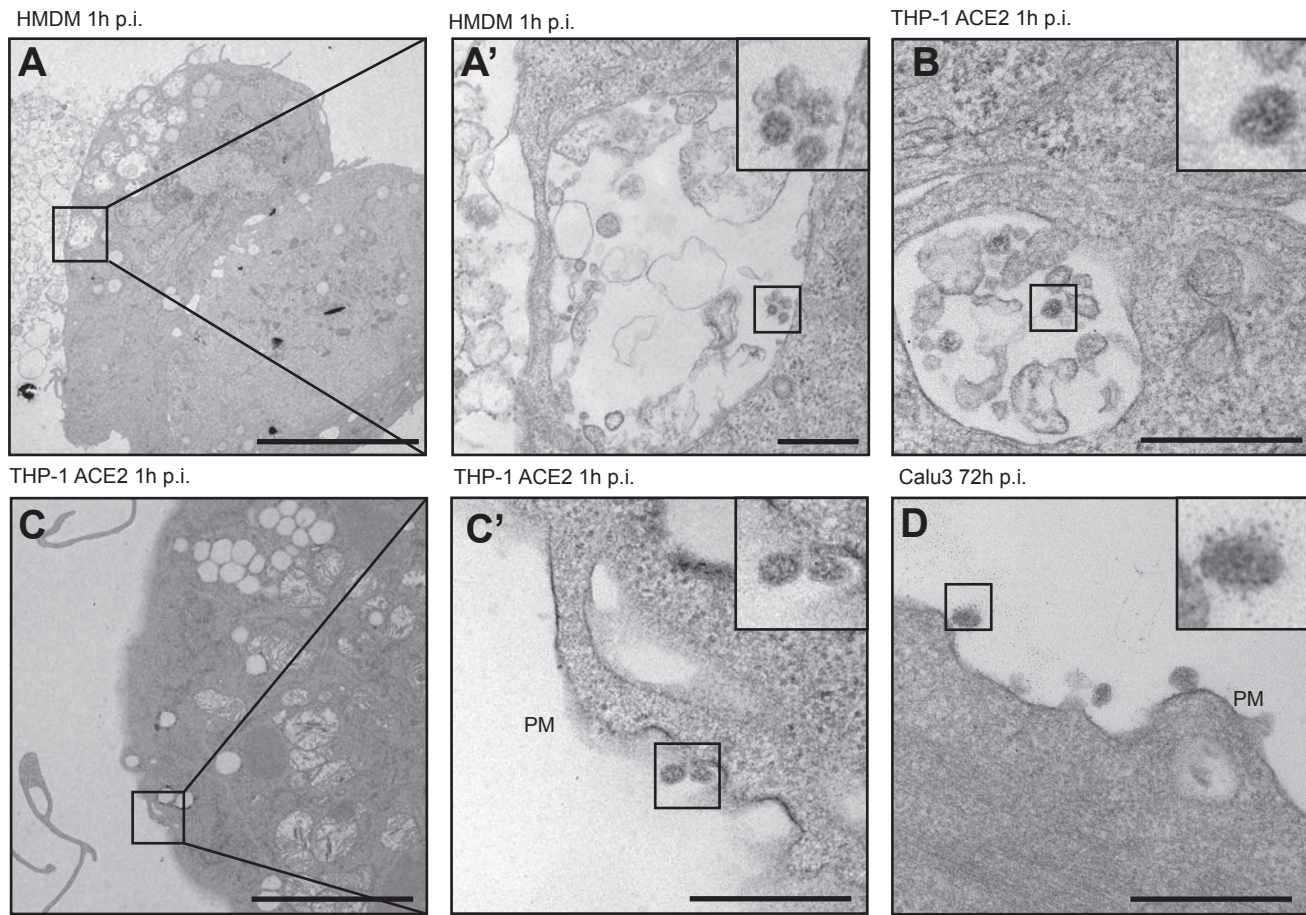

Figure 5

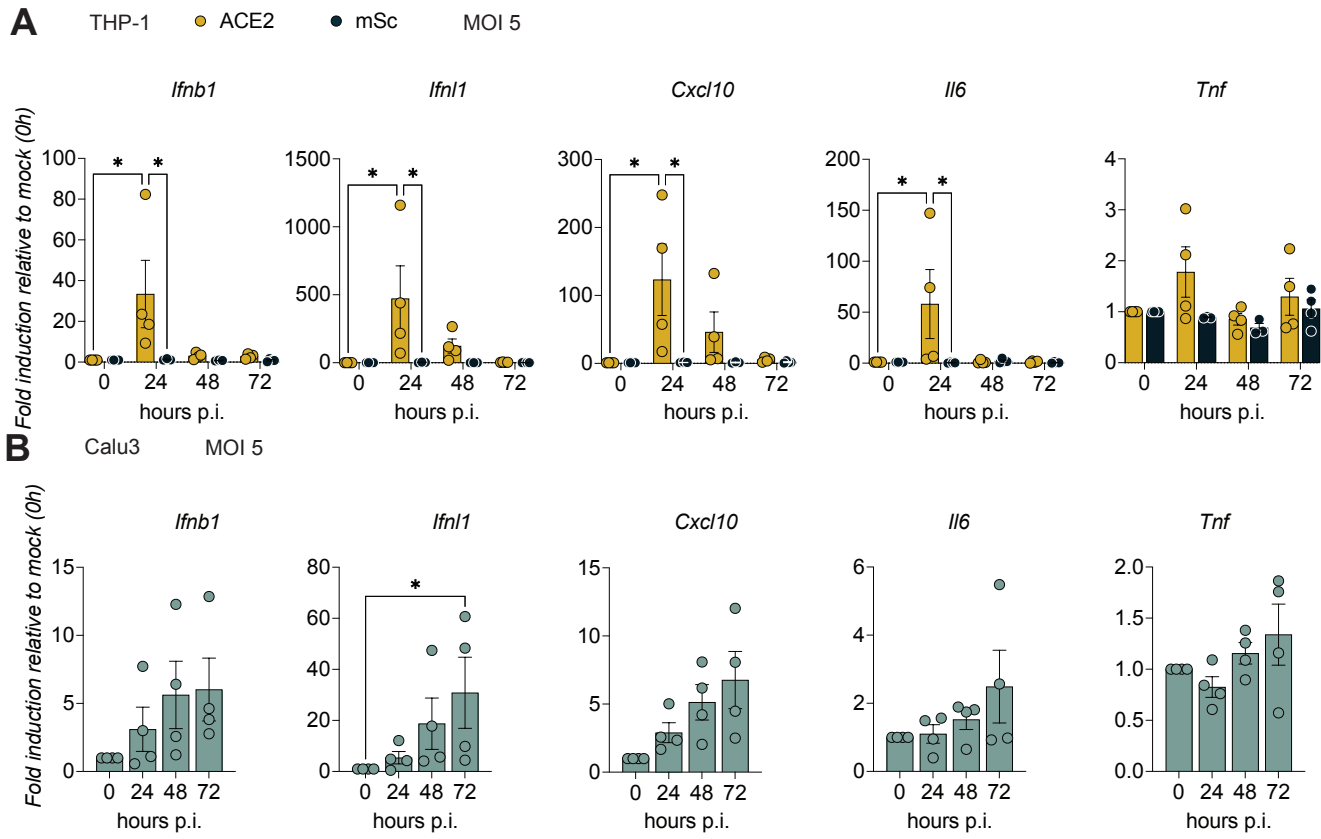



Figure 6

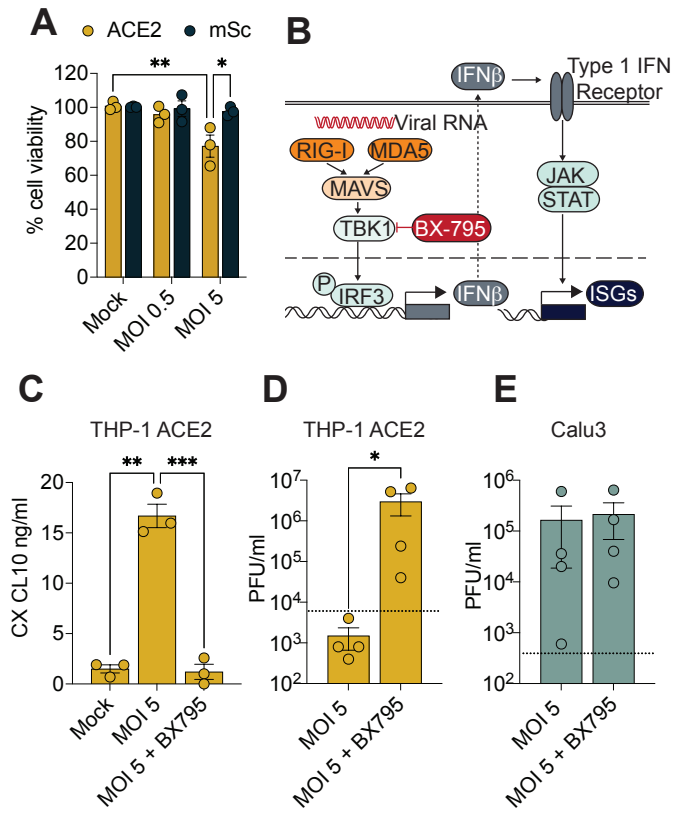

Source: https://www.biorxiv.org/content/10.1101/2022.03.22.485248v1.full.pdf
